# Supplementary material
Source: Springer Nature journal article supplement (https://www.springermedizin.de/resource/supplementary/13229_2012_41_MOESM6_ESM.pdf/9676072)

# NLGN3 Intronic Variant Tested

chrX:70291656, Intronic SNV

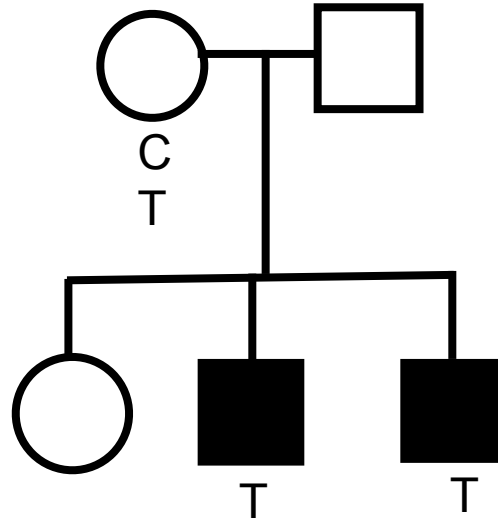

Supplement: MOESM6 [file 9676072]
